# Supplementary material for: Ti3C2‐MXene Partially Derived Hierarchical 1D/2D TiO2/Ti3C2 Heterostructure Electrode for High‐Performance Capacitive Deionization
Source: PubMed Central journal article supplement (PMC9839853; doi:10.1002/advs.202204041), 2022-11-28
Supplement: ADVS-10-2204041-s001.pdf [file ADVS-10-2204041-s001.pdf]

## Supporting Information

for *Adv. Sci.*, DOI 10.1002/adv.202204041

Ti<sub>3</sub>C<sub>2</sub>-MXene Partially Derived Hierarchical 1D/2D TiO<sub>2</sub>/Ti<sub>3</sub>C<sub>2</sub> Heterostructure Electrode for High-Performance Capacitive Deionization

*Ningning Liu, Lanlan Yu, Baojun Liu, Fei Yu, Liqing Li, Yi Xiao, Jinhua Yang and Jie Ma\**

# Supporting information

## **Ti<sub>3</sub>C<sub>2</sub>-MXene Partially Derived Hierarchical 1D/2D TiO<sub>2</sub>/Ti<sub>3</sub>C<sub>2</sub> Heterostructure Electrode for High-Performance Capacitive Deionization**

Ningning Liu<sup>1</sup>, Lanlan Yu<sup>2</sup>, Baojun Liu<sup>2</sup>, Fei Yu<sup>3</sup>, Liqing Li<sup>4</sup>, Yi Xiao<sup>5</sup>, Jinhu Yang<sup>6</sup>,  
Jie Ma<sup>1,4\*</sup>

1 Research Center for Environmental Functional Materials, State Key Laboratory of Pollution Control and Resource Reuse, College of Environmental Science and Engineering, Tongji University, 1239 Siping Road, Shanghai 200092, P.R. China

2 College of Resource and Environmental Engineering, Guizhou University, Guiyang, 550025, China

3 College of Marine Ecology and Environment, Shanghai Ocean University, Shanghai 201306, P.R. China

4 Faculty of Materials Metallurgy and Chemistry, Jiangxi University of Science and Technology, Ganzhou, 341000, P.R. China

5 School of Chemical Science and Engineering, Tongji University, 1239 Siping Road, Shanghai, 200092, P. R. China

6 Institute of Materials Science, TU Darmstadt 64287, Darmstadt, Germany

## Computational formula

The specific capacity ( $C$ ) was calculated on the basis of Eq. (1).

$$C = \frac{\int I \times dt}{m \times v \times \Delta V} \quad (1)$$

Where  $C$  is the specific capacitance ( $F \text{ g}^{-1}$ ),  $I$  is the current (A),  $v$  is the scan rate ( $V \text{ s}^{-1}$ ),  $\Delta V$  is the applied potential window (V), and  $m$  is the electrode material mass (g).

CV curves at different scan rates were used to quantify the contributions from diffusion-controlled process ( $k_1 v^{1/2}$ ) and capacitive process ( $k_2 v$ ), according to Eq. (2) and Eq. (3).

$$i_{total} = i_{insertion} + i_{capacitive} = k_1 v^{(1/2)} + k_2 v \quad (2)$$

$$i(V)/v^{(1/2)} = k_1 + k_2 v^{(1/2)} \quad (3)$$

Where  $i(V)$  and  $v$  represent the total current (A) at a given potential and the sweep rate ( $v, V \text{ s}^{-1}$ ) of a CV experiment.  $k_1$  or  $k_2$  is constant.

The SAC ( $\text{mg g}^{-1}$ ) was calculated based on the conversion of conductivity to NaCl concentration, as presented in the following equation:

$$SAC = \frac{(C_0 - C_e) \times V}{m} \quad (4)$$

where  $C_0$  and  $C_e$  are the concentration of NaCl at initial and final stages ( $\text{mg L}^{-1}$ ), respectively;  $V$  is the volume of NaCl solution (L); and  $m$  is the total active mass of the  $\text{TiO}_2/\text{Ti}_3\text{C}_2$  cathode (e.g., 0.016 g).

The SAR ( $\text{mg g}^{-1} \text{ min}^{-1}$ ) was calculated following to Eq. (5).

$$SAR = \frac{SAC}{t} \quad (5)$$

Where SAC is the desalination capacity ( $\text{mg} \cdot \text{g}^{-1}$ ), and  $t$  is the desalination time (min).

The energy consumption required for removing 1 Kg NaCl ( $E_M, \text{KWh Kg}^{-1} \text{ NaCl}$ ) and for treating 1 L feed water ( $E_V, \text{Wh m}^{-3}$ ) are calculated by the following formula:

$$E_{in} = \int_0^{t_{cycle}} IV dt, \text{ where } IV > 0 \quad (6)$$

$$E_{out} = \int_0^{t_{cycle}} IV dt, \text{ where } IV < 0 \quad (7)$$

$$E_m = \frac{E_{in} - \eta E_{out}}{(C_0 - C_e)V_d} \quad (8)$$

$$E_v = \frac{E_{in} - \eta E_{out}}{V_d} \quad (9)$$

where  $IV$  is the current-voltage product for a single electrode pair (W),  $t_{cycle}$  means the time corresponding to one desalination cycle (min).  $E_{in}$  is the total energy input during the batch-mode cycle (J),  $E_{out}$  is the total recoverable energy from the cell over the batch mode cycle (J), and  $\eta$  is the fraction of  $E_{out}$  actually recovered and re-used to power another charging phase.  $\eta$  is a part of  $E_{out}$ , which actually represents the next charging stage of recycling and reuse. Theoretically, the  $\eta$  approximately equals to 1.  $V_d$  is the volume of desalinated water collected, the value of  $V_d$  in our work is  $0.00004 \text{ m}^3$ .  $C_0$  and  $C_e$  are the concentration of NaCl at initial and final stages, respectively.

Charge efficiency (CE,  $\Lambda$ ) of the HCDI system was calculated based on the ratio of the removed salt to charge passed through the cell, according to the following formula:

$$\Lambda = \frac{\Gamma F}{\Sigma} \quad (10)$$

Where  $\Lambda$  is the charge efficiency (%),  $F$  is the Faraday constant ( $96485 \text{ C mol}^{-1}$ ),  $\Gamma$  is the total salt adsorption ( $\text{mol g}^{-1}$ ), and  $\Sigma$  is the total charge during the CDI adsorption process (C).

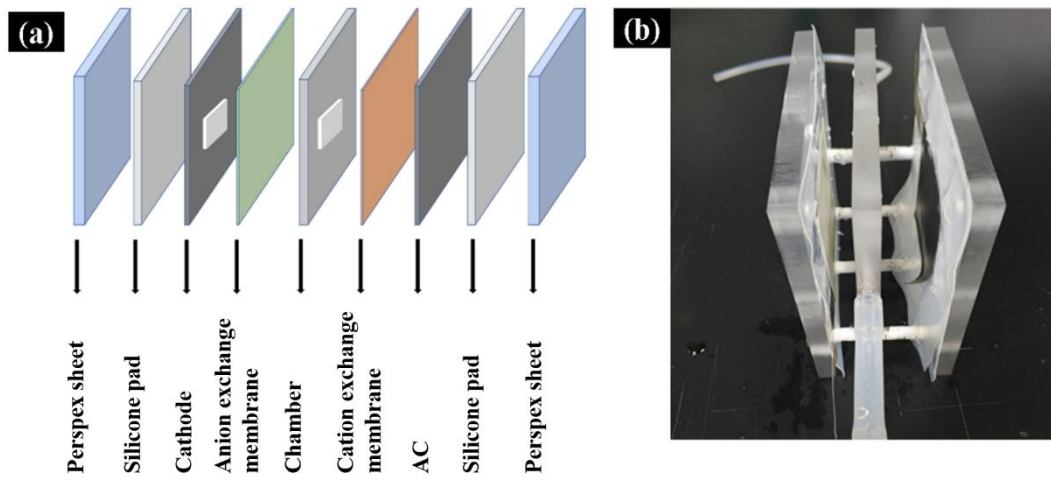

Figure S1 Schematic diagram and image of the CDI unit cell.

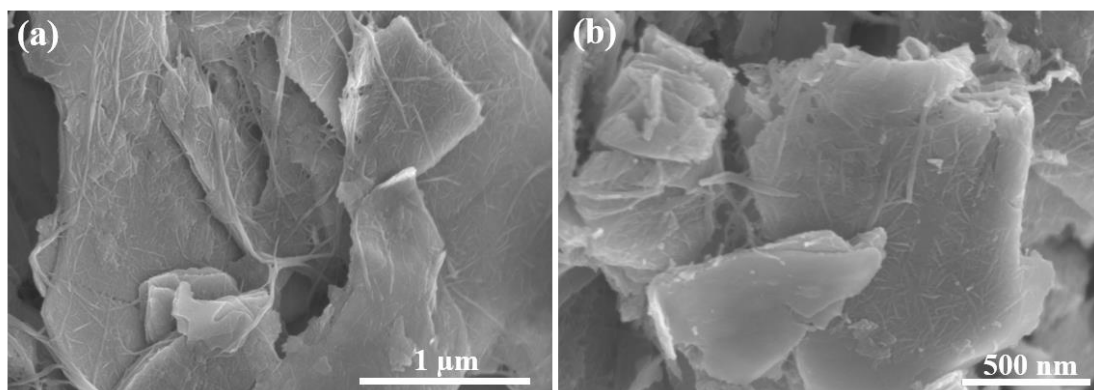

Figure S2 SEM images of TiO<sub>2</sub>/Ti<sub>3</sub>C<sub>2</sub>-8.

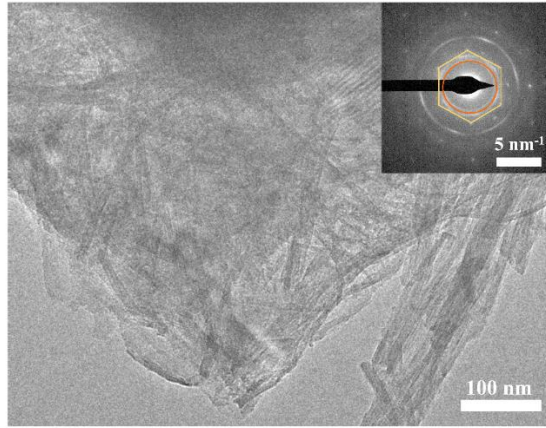

Figure S3 SAED pattern of TiO<sub>2</sub>/Ti<sub>3</sub>C<sub>2</sub> composite.

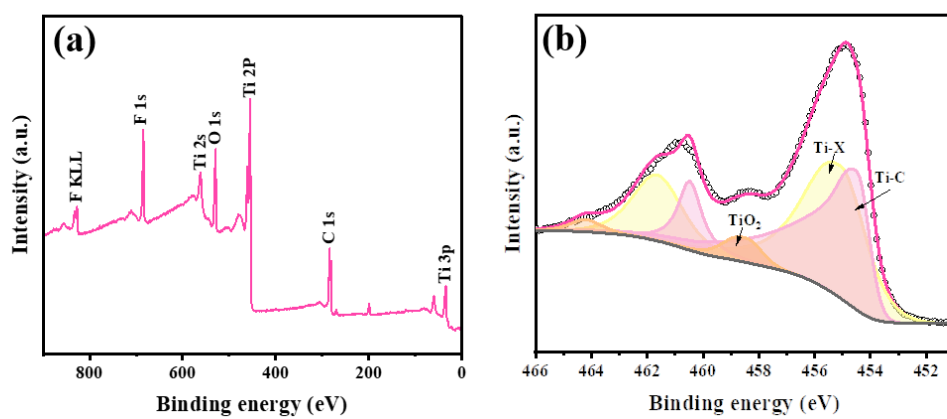

Figure S4 XPS survey spectrum and high-resolution Ti 2p of  $\text{Ti}_3\text{C}_2$



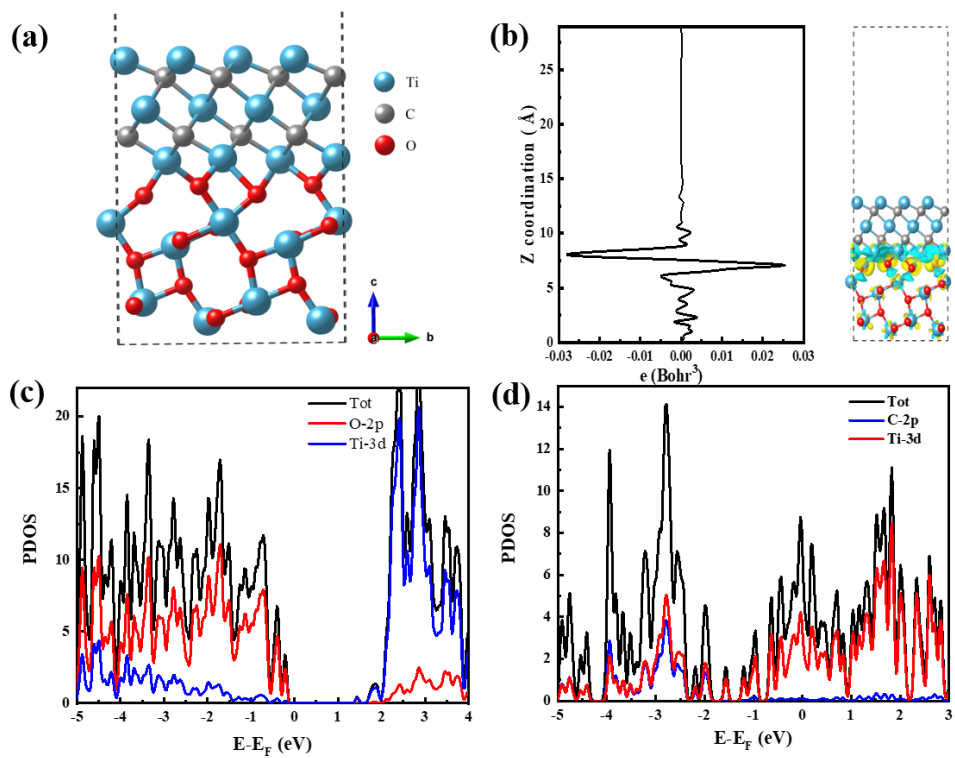

Figure S5 (a) Crystal model of  $\text{TiO}_2/\text{Ti}_3\text{C}_2$  heterojunction after relaxation; (b) Planar electrostatic potential and charge difference of  $\text{TiO}_2/\text{Ti}_3\text{C}_2$ ; DOS analysis of (c)  $\text{TiO}_2$  and (d)  $\text{Ti}_3\text{C}_2$ .

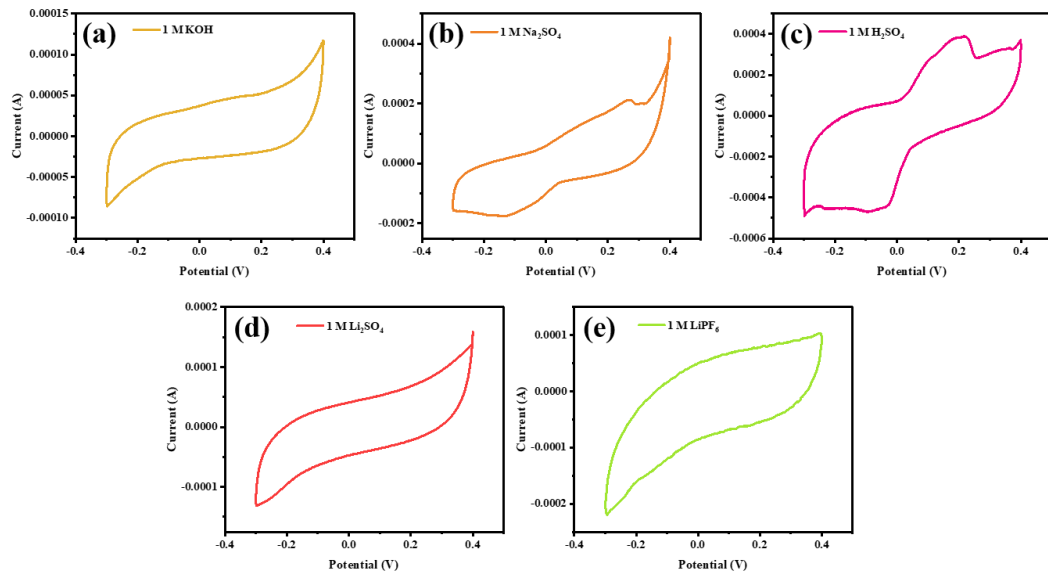

Figure S6 CV profiles of  $\text{TiO}_2/\text{Ti}_3\text{C}_2$  in different electrolytes at scan rate of  $1 \text{ mV s}^{-1}$ .

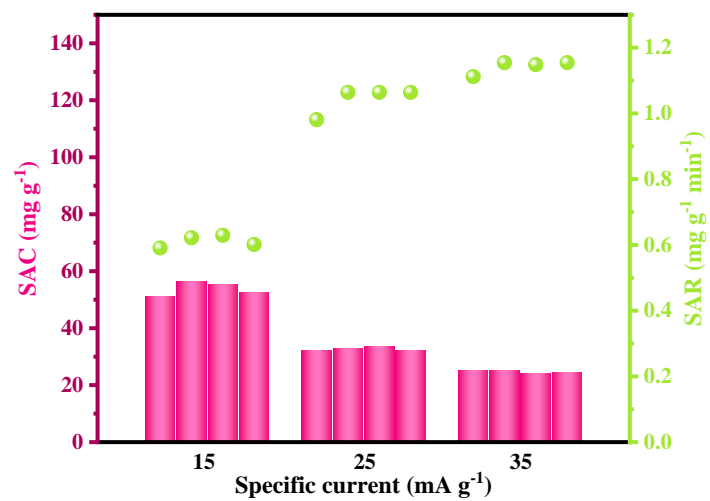

Figure S7 Salt adsorption capacity and rate of  $\text{TiO}_2/\text{Ti}_3\text{C}_2$  under different current densities in membrane-free CDI system.

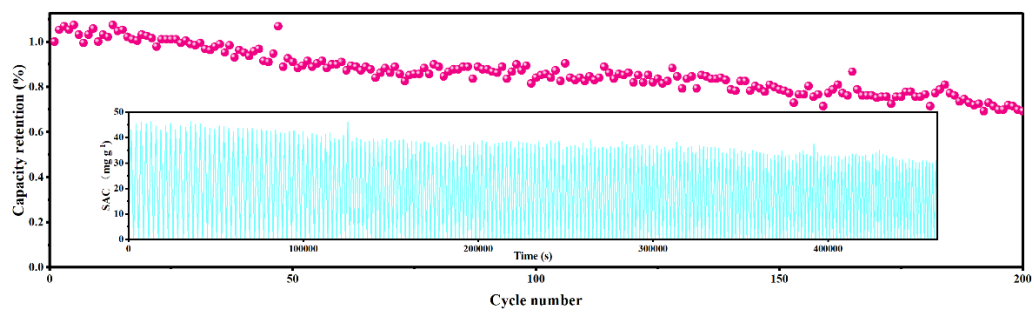

Figure S8 Desalination capacity retention of  $\text{TiO}_2/\text{Ti}_3\text{C}_2$  electrode at the current density of  $25 \text{ mA g}^{-1}$  over 200 cycles and the corresponding change in desalination capacity over time.

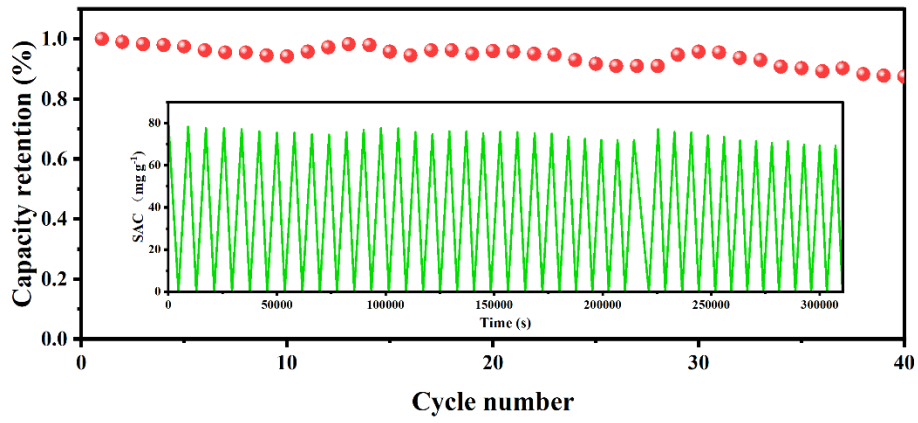

Figure S9 Desalination capacity retention of  $\text{TiO}_2/\text{Ti}_3\text{C}_2$  electrode at the current density of  $15 \text{ mA g}^{-1}$  over 40 cycles and the corresponding change in desalination capacity over time.

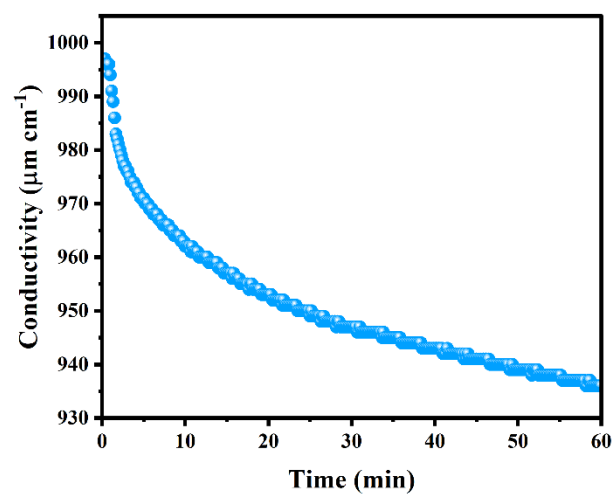

Figure S10 Plot of NaCl solution conductivity variation versus time during the desalination process tested in  $500 \text{ mg L}^{-1}$  NaCl solution at an applied voltage of 1.2 V for 60 min.

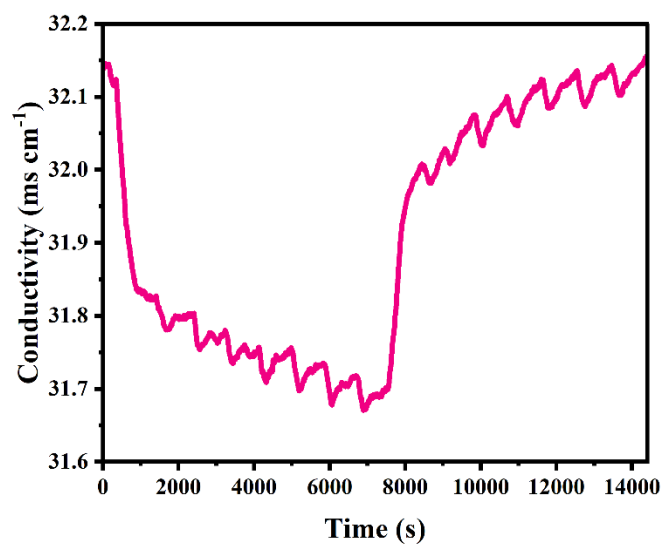

Figure S11 Solution conductivity vs. runtime of TiO<sub>2</sub>/Ti<sub>3</sub>C<sub>2</sub> electrode in a NaCl aqueous solution of 500 mM upon an external voltage of 1.2 V.

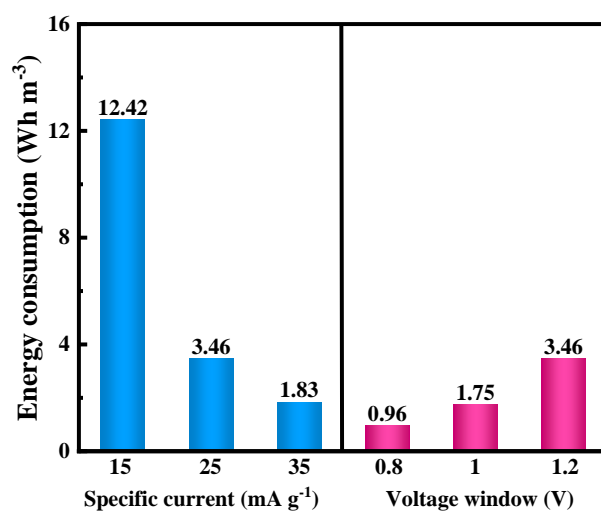

Figure S12 Energy consumption required for treating 1 L feed water ( $E_V$ , Wh m<sup>-3</sup>) at different current density and voltage windows.



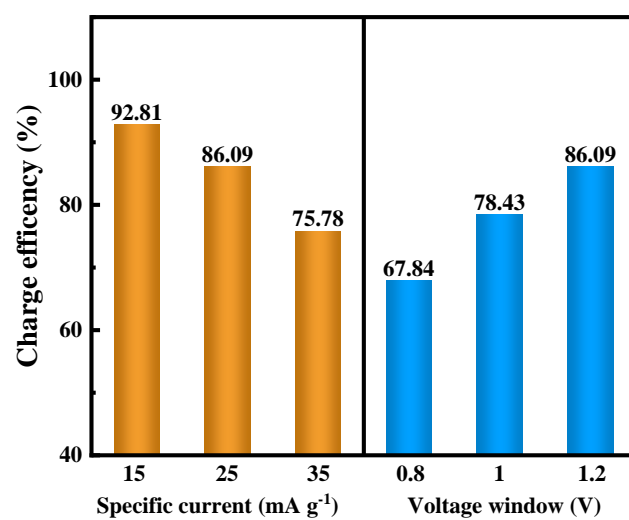

Figure S13 Charge efficiency of TiO<sub>2</sub>/Ti<sub>3</sub>C<sub>2</sub> under various operating conditions.

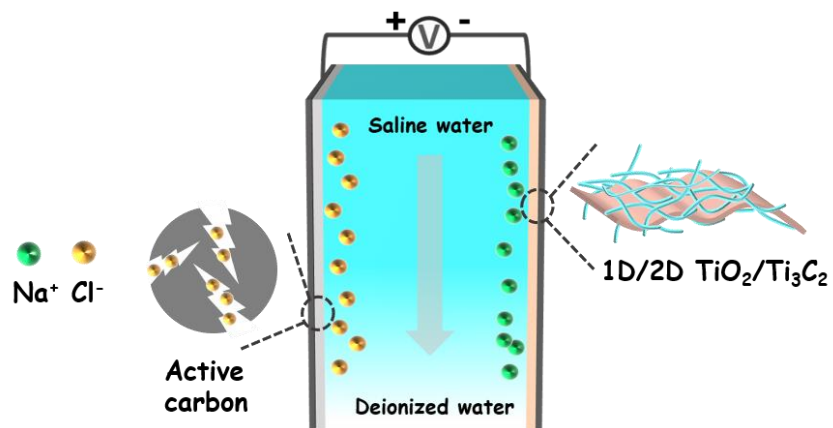

Figure S14 Schematic diagram for the asymmetric CDI cell (AC//TiO<sub>2</sub>/Ti<sub>3</sub>C<sub>2</sub>)

Table S1 Atomic fraction of elements on the surfaces of  $\text{Ti}_3\text{C}_2/\text{TiO}_2$  composites.

| Element | Atomic Fraction (%) |
|---------|---------------------|
| C       | 12.90               |
| Ti      | 40.84               |
| O       | 38.68               |
| F       | 7.58                |

Table S2 Capacitance comparison with other electrodes based on TiO<sub>2</sub>/MXene heterostructures

| Electrode materials                                                      | Scan rate/ Current density | Electrolyte                         | Specific capacity        | Ref       |
|--------------------------------------------------------------------------|----------------------------|-------------------------------------|--------------------------|-----------|
| TiO <sub>2</sub> -Ti <sub>3</sub> C <sub>2</sub>                         | 5 mV s <sup>-1</sup>       | 6 M KOH                             | 143 F g <sup>-1</sup>    | [1]       |
| TiO <sub>2</sub> /Ti <sub>3</sub> C <sub>2</sub>                         | 0.3 A g <sup>-1</sup>      | 2 M KOH                             | 102.5 F g <sup>-1</sup>  | [2]       |
| TiO <sub>2</sub> /Ti <sub>3</sub> C <sub>2</sub> T <sub>x</sub> -350     | 1 mV s <sup>-1</sup>       | 1 M NaCl                            | 164 F g <sup>-1</sup>    | [3]       |
| PANI@TiO <sub>2</sub> /Ti <sub>3</sub> C <sub>2</sub> T <sub>x</sub>     | 10 mV s <sup>-1</sup>      | 1 M KOH                             | 188.3 F g <sup>-1</sup>  | [4]       |
| GO/TiO <sub>2</sub>                                                      | 5 mV s <sup>-1</sup>       | 1 M Na <sub>2</sub> SO <sub>4</sub> | 100 F g <sup>-1</sup>    | [5]       |
| N-Ti <sub>3</sub> C <sub>2</sub> T <sub>x</sub>                          | 1 mV s <sup>-1</sup>       | 1 M H <sub>2</sub> SO <sub>4</sub>  | 192 F g <sup>-1</sup>    | [6]       |
| N/S-Ti <sub>3</sub> C <sub>2</sub>                                       | 2 mV s <sup>-1</sup>       | 1 M Li <sub>2</sub> SO <sub>4</sub> | 175 F g <sup>-1</sup>    | [7]       |
| Ti <sub>3</sub> C <sub>2</sub> /TiO <sub>2</sub> -nanoparticles          | 2 mV s <sup>-1</sup>       | 6 M KOH                             | 128 F g <sup>-1</sup>    | [8]       |
| N-TiO <sub>2</sub> /TiN/Ti <sub>3</sub> C <sub>2</sub> T <sub>x</sub> -6 | 5 mV s <sup>-1</sup>       | 1 M H <sub>2</sub> SO <sub>4</sub>  | 125 F g <sup>-1</sup>    | [9]       |
| TiO <sub>2</sub> /MXene/GO                                               | 10 A g <sup>-1</sup>       | 1 M LiPF <sub>6</sub>               | 78 mAh g <sup>-1</sup>   | [10]      |
| HC-MXene/TiO <sub>2</sub>                                                | 1 A g <sup>-1</sup>        | 1 M NaClO <sub>4</sub>              | 250 mAh g <sup>-1</sup>  | [11]      |
| 2D/2D TiO <sub>2</sub> /MXene                                            | 1 A g <sup>-1</sup>        | 1 M LiPF <sub>6</sub>               | 55 mAh g <sup>-1</sup>   | [12]      |
| N-TiO <sub>2-x</sub> /C                                                  | 0.1 A g <sup>-1</sup>      | 1 M NaCl                            | 23.6 mAh g <sup>-1</sup> | [13]      |
| TiO <sub>2</sub> /Ti <sub>3</sub> C <sub>2</sub>                         | 10 mV s <sup>-1</sup>      | 1 M NaCl                            | 207 F g <sup>-1</sup>    | This work |
|                                                                          | 1 mV s <sup>-1</sup>       | 1 M KOH                             | 93 F g <sup>-1</sup>     |           |
|                                                                          | 1 mV s <sup>-1</sup>       | 1 M Na <sub>2</sub> SO <sub>4</sub> | 233 F g <sup>-1</sup>    |           |
|                                                                          | 1 mV s <sup>-1</sup>       | 1 M H <sub>2</sub> SO <sub>4</sub>  | 528 F g <sup>-1</sup>    |           |
|                                                                          | 1 mV s <sup>-1</sup>       | 1M Li <sub>2</sub> SO <sub>4</sub>  | 123 F g <sup>-1</sup>    |           |
|                                                                          | 1 mV s <sup>-1</sup>       | 1 M LiPF <sub>6</sub>               | 173 F g <sup>-1</sup>    |           |

Table S3 Internal resistance ( $R_s$ ) and charge transfer resistance ( $R_{ct}$ ) of  $Ti_3C_2$  and

$TiO_2/Ti_3C_2$

| Sample          | $R_s$ ( $\Omega$ ) | $R_{ct}$ ( $\Omega$ ) |
|-----------------|--------------------|-----------------------|
| $Ti_3C_2$       | 1.33               | 1.25                  |
| $TiO_2/Ti_3C_2$ | 1.42               | 0.81                  |

Table S4 Summary of salt desalination performance of MXene-based electrodes materials.

| MXene-based electrode                                            | Operation mode | Initial concentration (mg L <sup>-1</sup> ) | Applied voltage/Current density | SAC (mg g <sup>-1</sup> ) | SAR (mg g <sup>-1</sup> min <sup>-1</sup> ) | Cycle stability | Energy Consumption             | Ref. |
|------------------------------------------------------------------|----------------|---------------------------------------------|---------------------------------|---------------------------|---------------------------------------------|-----------------|--------------------------------|------|
| NaOH-Ti <sub>3</sub> C <sub>2</sub> T <sub>x</sub>               | Flow-by CDI    | 100                                         | 1.2 V                           | 12.19                     | -                                           | 20              | -                              | [14] |
| PPy-NiCo-L                                                       | Flow-by        | 200                                         | 1.2 V                           | 31.5                      | 4.7                                         | 40              | -                              | [15] |
| DH@MXene                                                         | CDI            |                                             |                                 |                           |                                             |                 |                                |      |
| Ti <sub>3</sub> C <sub>2</sub> -MXene                            | Flow-by CDI    | 292                                         | 1.2 V                           | 13±2                      | 1                                           | 30              | -                              | [16] |
| Fe <sub>3</sub> O <sub>4</sub> @Ti <sub>3</sub> C <sub>2</sub>   | Flow-by MCDI   | 500                                         | 1.2 V                           | 44                        | 1.47                                        | 40              | -                              | [17] |
| mPDA/MXene                                                       | Flow-by MCDI   | 1000                                        | 1.5 V                           | 37.72                     | 1.27                                        | 200             | 0.69 kWh kg <sup>-1</sup> NaCl | [18] |
| poly(vinylalcohol)/Ti <sub>3</sub> C <sub>2</sub> T <sub>x</sub> | Flow-by MCDI   | 1000                                        | 10 mA g <sup>-1</sup>           | 41.4                      | -                                           | 100             | 25 kWh kg <sup>-1</sup> NaCl   | [19] |
| N-Ti <sub>3</sub> C <sub>2</sub> T <sub>x</sub>                  | Flow-by        | 5000                                        | 1.2 V                           | 43.5±                     | -                                           | 24              | -                              | [20] |

---

|                                                                 |         |      |       |       |      |     |                    |      |
|-----------------------------------------------------------------|---------|------|-------|-------|------|-----|--------------------|------|
|                                                                 | CDI     |      |       |       | 1.7  |     |                    |      |
| <b>MXene/rGO</b>                                                | Flow-by | 135  | 1.2 V | 48    | 4.8  | 10  | -                  | [21] |
|                                                                 | CDI     |      |       |       |      |     |                    |      |
| <b>Functional-ized MXene</b>                                    | Flow-by | 5000 | 1.2 V | 49    | 2.92 | 100 | 0.38               | [22] |
|                                                                 | CDI     |      |       |       |      |     | kWh                |      |
|                                                                 |         |      |       |       |      |     | kg <sup>-1</sup>   |      |
|                                                                 |         |      |       |       |      |     | NaCl               |      |
| <b>MXene/BC</b>                                                 | Flow-by | 585  | 1.2 V | 12.27 | 1.23 | 20  | 63                 | [23] |
|                                                                 | CDI     |      |       |       |      |     | Wh·m <sup>-3</sup> |      |
| <b>Cellulose fibers/</b>                                        | Flow-by | 600  | 1.2 V | 34    | 0.81 | 10  | 53.5               | [24] |
| <b>Ti<sub>3</sub>C<sub>2</sub>T<sub>x</sub></b>                 | CDI     |      |       |       |      |     | kT/ion             |      |
| <b>MXene</b>                                                    |         |      |       |       |      |     |                    |      |
| <b>W<sub>18</sub>O<sub>49</sub>/Ti<sub>3</sub>C<sub>2</sub></b> | Flow-by | 500  | 1.2 V | 29.25 | 0.97 | 10  | 0.5642             | [25] |
|                                                                 | MCDI    |      |       |       |      |     | kWh                |      |
|                                                                 |         |      |       |       |      |     | kg <sup>-1</sup>   |      |
|                                                                 |         |      |       |       |      |     | NaCl               |      |
| <b>MXene@CO</b>                                                 | Flow-by | 500  | 1.2 V | 24.5  | 0.81 | 100 | -                  | [26] |
| <b>F</b>                                                        | CDI     |      |       |       |      |     |                    |      |
| <b>MoS<sub>2</sub>@MXe</b>                                      | Flow-by | 500  | 1.2 V | 35.6  | 2.6  | 40  | 0.544              | [27] |
| <b>ne</b>                                                       | CDI     |      |       |       |      |     | kWh                |      |
|                                                                 |         |      |       |       |      |     | kg <sup>-1</sup>   |      |

---





## References

- [1] J. Zhu, Y. Tang, C. Yang, F. Wang, M. Cao, *Journal of The Electrochemical Society* **2016**, 163, A785.
- [2] Z. Li, Y. Liu, D. Guo, R. Jia, X. Zhai, L. Zhang, *Materials Research Express* **2019**, 6, 065056.
- [3] W. XI, H. LI, *Journal of Inorganic Materials* **2021**, 36, 283.
- [4] X. Lu, J. Zhu, W. Wu, B. Zhang, *Electrochimica Acta* **2017**, 228, 282.
- [5] R. Liu, W. Guo, B. Sun, J. Pang, M. Pei, G. Zhou, *Electrochimica Acta* **2015**, 156, 274.
- [6] W. Bao, L. Liu, C. Wang, S. Choi, D. Wang, G. Wang, *Advanced Energy Materials* **2018**, 8, 1702485.
- [7] C. Yang, W. Que, Y. Tang, Y. Tian, X. Yin, *Journal of the Electrochemical Society* **2017**, 164, A1939.
- [8] M. Cao, F. Wang, L. Wang, W. Wu, W. Lv, J. Zhu, *Journal of The Electrochemical Society* **2017**, 164, A3933.
- [9] B. Yang, Y. She, C. Zhang, S. Kang, J. Zhou, W. Hu, *Nanomaterials* **2020**, 10, 345.
- [10] R. Niu, R. Han, S. Tang, J. Zhu, *Journal of Power Sources* **2022**, 542, 231738.
- [11] P. Gao, H. Shi, T. Ma, S. Liang, Y. Xia, Z. Xu, S. Wang, C. Min, L. Liu, *ACS Applied Materials & Interfaces* **2021**, 13, 51028.
- [12] R. Niu, R. Han, Y. Wang, L. Zhang, Q. Qiao, L. Jiang, Y. Sun, S. Tang, J. Zhu, *Chemical Engineering Journal* **2021**, 405, 127049.
- [13] M. Liang, X. Bai, F. Yu, J. Ma, *Nano Research* **2021**, 14, 684.
- [14] B. Chen, A. Feng, R. Deng, K. Liu, Y. Yu, L. Song, *ACS Applied Materials & Interfaces* **2020**, 12, 13750.

- [15] Y. Cai, Y. Wang, R. Fang, J. Wang, *Separation and Purification Technology* **2022**, 280, 119828.
- [16] P. Srimuk, F. Kaasik, B. Krüner, A. Tolosa, S. Fleischmann, N. Jäckel, M. C. Tekeli, M. Aslan, M. E. Suss, V. Presser, *Journal of Materials Chemistry A* **2016**, 4, 18265.
- [17] K. Wang, L. Chen, G. Zhu, X. Xu, L. Wan, T. Lu, L. Pan, *Desalination* **2022**, 522, 115420.
- [18] Q. Li, X. Xu, J. Guo, J. P. Hill, H. Xu, L. Xiang, C. Li, Y. Yamauchi, Y. Mai, *Angewandte Chemie International Edition* **2021**, 60, 26528.
- [19] J. Ai, J. Li, K. Li, F. Yu, J. Ma, *Chemical Engineering Journal* **2021**, 408, 127256.
- [20] A. Amiri, Y. Chen, C. Bee Teng, M. Naraghi, *Energy Storage Materials* **2020**, 25, 731.
- [21] H. Xu, M. Li, S. Gong, F. Zhao, Y. Zhao, C. Li, J. Qi, Z. Wang, H. Wang, X. Fan, W. Peng, J. Liu, *Journal of Colloid and Interface Science* **2022**, 624, 233.
- [22] Z. Bo, Z. Huang, C. Xu, Y. Chen, E. Wu, J. Yan, K. Cen, H. Yang, K. Ostrikov, *Energy Storage Materials* **2022**, 50, 395.
- [23] B. Li, K. Sun, W. Xu, X. Liu, A. Wang, S. Boles, B. Xu, H. Hu, D. Yao, *Nano Research* **2022**.
- [24] S. Anwer, D. H. Anjum, S. Luo, Y. Abbas, B. Li, S. Iqbal, K. Liao, *Chemical Engineering Journal* **2021**, 406, 126827.
- [25] J. Liang, J. Yu, W. Xing, W. Tang, N. Tang, J. Guo, *Chemical Engineering Journal* **2022**, 435, 134922.
- [26] S. Zhang, X. Xu, X. Liu, Q. Yang, N. Shang, X. Zhao, X. Zang, C. Wang, Z. Wang, J. G. Shapter, Y. Yamauchi, *Materials Horizons* **2022**, 9, 1708.
- [27] Y. Cai, Y. Wang, L. Zhang, R. Fang, J. Wang, *ACS Applied Materials & Interfaces* **2022**, 14, 2833.
- [28] J. Ma, Y. Cheng, L. Wang, X. Dai, F. Yu, *Chemical Engineering Journal* **2020**, 384, 123329.
